# Supplementary material for: Targeted synthesis of carbon-supported titanate nanofibers as host structure for nuclear waste immobilization
Source: publisher site journal article supplement (doi:10.1515/ract-2021-1055), 2022-04-21
Supplement: Supplementary file 1 [file j_ract-2021-1055_suppl.docx]

**Supplementary Information**

**Targeted synthesis of carbon-supported titanate nanofibers as host structure for nuclear waste immobilization**

Lei Li a, Ran Ma a, Xuewei Liu a Tao Wen a,*, Bo Wu a, Mingtai Sunb, Zheng Jiang,a Suhua Wang a,b, Xiangke Wang a, *

aMOE Key Laboratory of Resources and Environmental Systems Optimization, College of Environmental Science and Engineering, North China Electric Power University, Beijing 102206, P.R. China

bGuangdong Provincial Key Laboratory of Petrochemical Pollution Process and Control, School of Environmental Science and Engineering, Guangdong University of Petrochemical Technology, Maoming, Guangdong 525000, P.R. China

*Corresponding authors: twen@ncepu.edu.cn (T. Wen), xkwang@ncepu.edu.cn (X. Wang). Tel (Fax): 86-10-61772890.

**Figure S1.** EDS spectra of (a) C@TNFs and (b) C@TNFs(H).

**Figure S2.** (a) N2 adsorption-desorption isotherms and the corresponding (b) pore size distributions of C@TNFs and C@TNFs(H).

**Figure S3.** TGA curves of C@TNFs and C@TNFs(H).

**Figure S4.** Adsorption kinetic curves of U(VI), Ba(II) and Sr(II) on (a) C@TNFs and (b) C@TNFs(H). The linear simulations of (c) C@TNFs and (d) C@TNFs(H) using pseudo-second-order kinetic model. (*C*0(U(VI)) = 10.0 ppm, *m/V* = 0.1 g L-1, pH = 6.0 ± 0.1, and *T* = 298 K)

**Figure S5.** (a) The values of the distribution coefficient *K*dU and (b) the ion-exchange percentage at various initial pH values of 2.0-11.0 (*C*0(U(VI)) = 10.0 ppm, *m/V* = 0.1 g L-1, and *T* = 298 K). (c) The values of the distribution coefficient *K*dU and (d) the ion-exchange percentage at various Ca(II):U(VI) molar ratios of 10-500. (*C*0(U(VI)) = 10.0 ppm, *m/V* = 0.1 g L-1, pH = 6.0 ± 0.1, and *T* = 298 K)

**Figure S6.** High-resolution XPS spectra of (a) U 4f, (b) Ba 3d and (c) Sr 3d.
